# Supplementary material for: De Ritis Ratio to Predict Clinical Outcomes of Intermediate- and High-Risk Pulmonary Embolisms
Source: MDPI journal article supplement (doi:10.3390/jcm13072104), 2024-04-04
Supplement: s1 [file s1]

**Table S1** Missing data

| Variable | Number missing | Percentage missing |
|----------|----------------|--------------------|
| BNP      | 48             | 20.8               |
| Troponin | 25             | 9.2                |

Abbreviations: BNP—B-type natriuretic peptide; CVP—central venous pressure; RVSP—right ventricular systolic pressure.

**Figure S1** Directed acyclic graph of covariates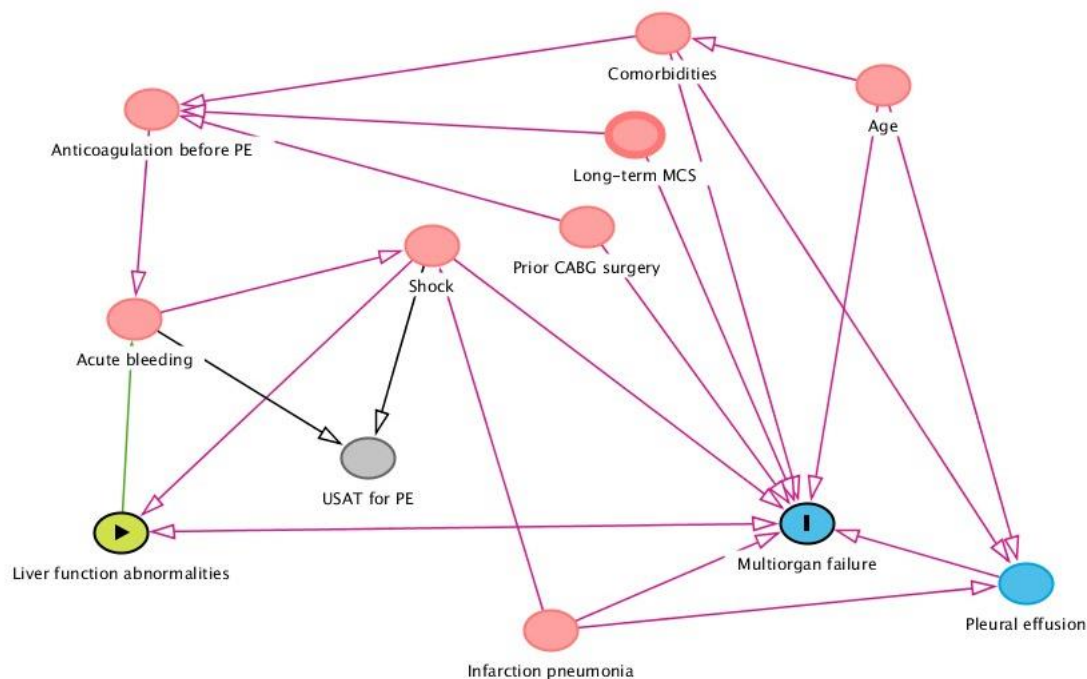

Directed acyclic graph (DAG) based on the influence of liver function abnormalities on multiorgan failure. Gray consists of other outcomes, green consists of (ancestor of) exposure, blue of (ancestor of) outcome and pink of ancestor of exposure and outcome, and thus as confounder.

Comorbidities include arterial hypertension, coronary artery disease, chronic left heart failure, precerebral stenosis, chronic obstructive pulmonary disease, diabetes mellitus type 2, obesity, and chronic kidney disease.

Abbreviations: CABG—coronary artery bypass graft; MCS—Mechanical circulatory support; PE—pulmonary embolism; USAT—ultrasound assisted thrombolysis.

**Table S2** Covariate balance after inverse probability weighting

| Covariate                  | Normal vs. Abnormal AST/ALT-ratio |                |
|----------------------------|-----------------------------------|----------------|
|                            | Weighted SMD                      | Unweighted SMD |
| Intermediate low-risk      | 0.071                             | 0.411          |
| Intermediate high-risk     | 0.088                             | 0.196          |
| High-risk                  | 0.024                             | 0.755          |
| Age                        | 0.260                             | 0.314          |
| Female gender              | 0.167                             | 0.003          |
| Long-term MCS              | 0.188                             | 0.198          |
| USAT for PE                | 0.068                             | 0.622          |
| Arterial hypertension      | 0.081                             | 0.106          |
| Coronary artery disease    | 0.019                             | 0.316          |
| Chronic left heart failure | 0.298                             | 0.561          |
| COPD                       | 0.141                             | 0.151          |
| Pleural effusion           | 0.028                             | 0.077          |
| Anticoagulation before PE  | 0.017                             | 0.037          |
| Prior CABG-surgery         | 0.048                             | 0.132          |
| Diabetes mellitus type 2   | 0.053                             | 0.211          |

|                               |       |       |
|-------------------------------|-------|-------|
| <b>Obesity</b>                | 0.019 | 0.127 |
| <b>Chronic kidney disease</b> | 0.019 | 0.001 |
| <b>Infarction pneumonia</b>   | 0.032 | 0.025 |
| <b>Shock</b>                  | 0.024 | 0.755 |

Abbreviations: ALT—alanine transaminase; AST—aspartate transaminase; CABG—coronary artery bypass graft; COPD—chronic obstructive pulmonary disease; CVP—central venous pressure; LOS—length of stay; MCS—Mechanical circulatory support; PE—pulmonary embolism; RVSP—right ventricular systolic pressure; SMD—standardized mean difference; USAT—ultrasound assisted thrombolysis.

**Figure S2** Covariate balance after inverse probability weighting

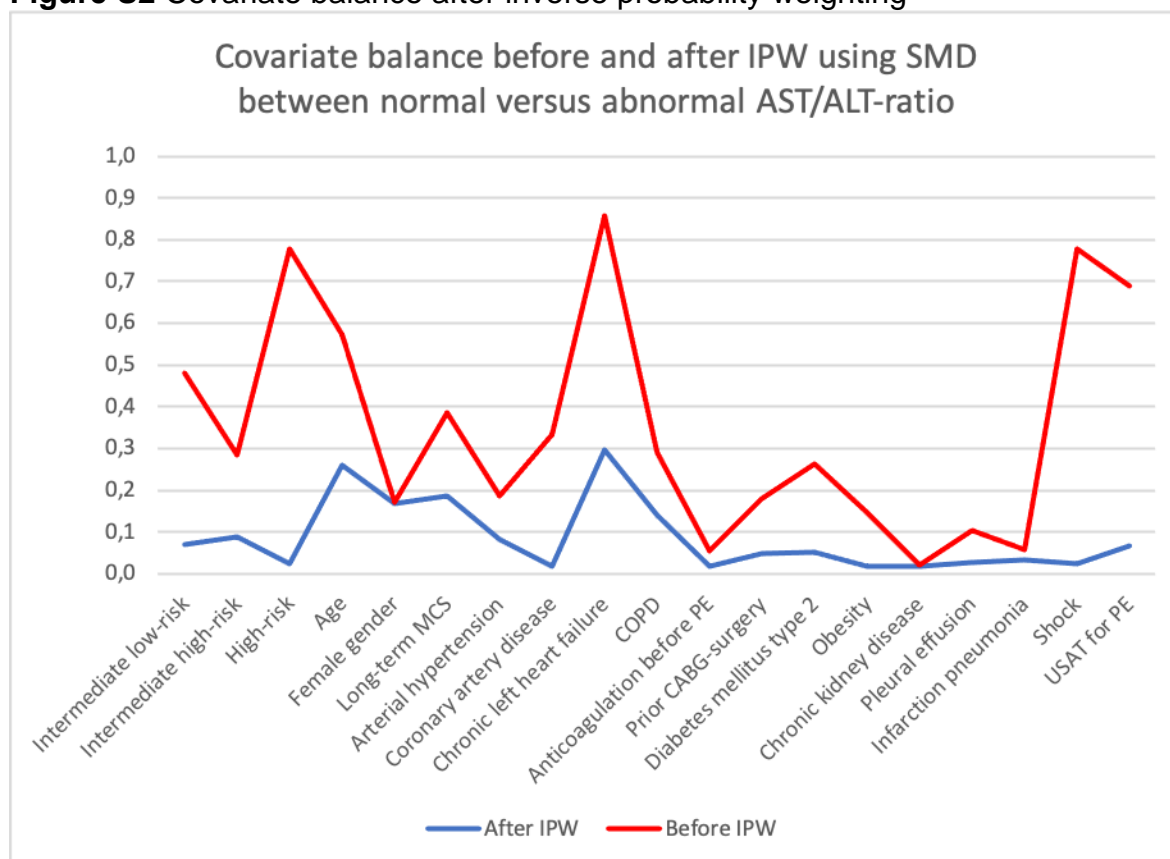

Abbreviations: ALT—alanine transaminase; AST—aspartate transaminase; CABG—coronary artery bypass graft; COPD—chronic obstructive pulmonary disease; CVP—central venous pressure; LOS—length of stay; MCS—Mechanical circulatory support; PE—pulmonary embolism; RVSP—right ventricular systolic pressure; SMD—standardized mean difference; USAT—ultrasound-assisted thrombolysis.
